# Supplementary material
Source: Springer Nature journal article supplement (https://www.springermedizin.de/resource/supplementary/13014_2009_228_MOESM4_ESM.pdf/9633226)

A

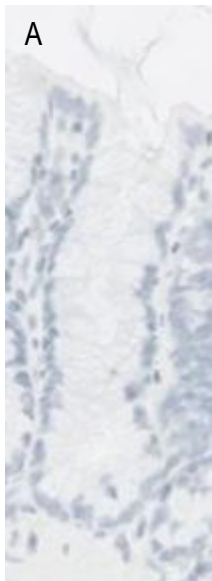

B

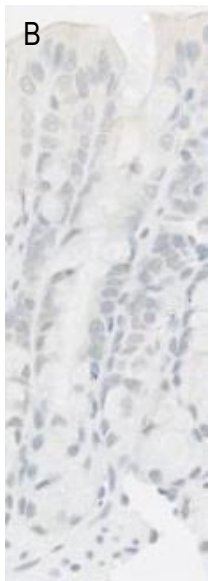

C

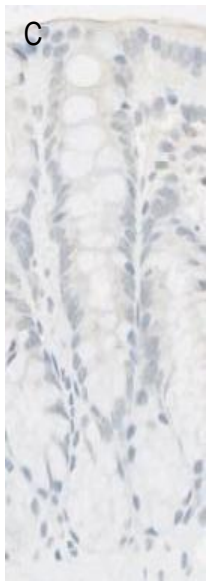

D

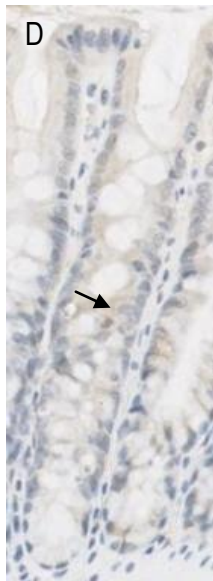

E

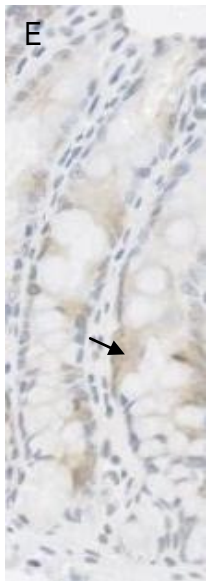

F

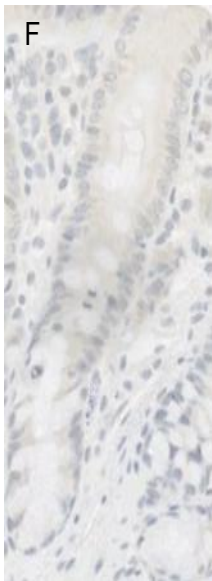

G

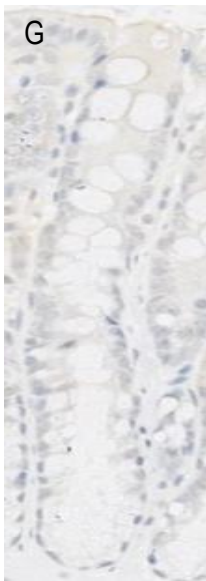

Supplement: MOESM4 [file 9633226]
